# Supplementary material
Source: HighWire-hosted journal article supplement (https://bmjopen.bmj.com/content/12/7/e060305)
Supplement: inline-supplementary-material-1 [file inline-supplementary-material-1.pdf]

**SUPPLEMENTARY MATERIAL S1****SUPPLEMENT T1: Codes used to define AVRI, CAD, stroke, DVT, and PE**

| <b>Condition</b>                                       | <b>Codes</b>                                                                                                                                                                             |
|--------------------------------------------------------|------------------------------------------------------------------------------------------------------------------------------------------------------------------------------------------|
| Acute viral respiratory illness (AVRI)                 | B9721, B9729, J09*, J10*, J11*, J12*, J16, J168, J18, J180, J181, J182, J188, J189, J20, J201, J203, J204, J205, J206, J207, J208, J209, J22, J40, J440, J470, J8411, J84111, U071, U072 |
| Coronary artery disease (CAD)                          | I20*, I21*, I22*, I23*, I24*, I25*                                                                                                                                                       |
| Stroke                                                 | I63*, Z8673*, I60*, I61*, I62*                                                                                                                                                           |
| Deep vein thrombosis (DVT) and pulmonary embolism (PE) | I8249, I824Y, I824Z, I8251, I8259, I825Y, I825Z, I8262, I8272, I26*, I2782                                                                                                               |

**SUPPLEMENT T2: Hypertension medications**

| <b>Medication type</b>                                        | <b>Included medications (generic name)</b>                                                                                                                                                                                                                                                                                                                                                                                                                                                                                                              |
|---------------------------------------------------------------|---------------------------------------------------------------------------------------------------------------------------------------------------------------------------------------------------------------------------------------------------------------------------------------------------------------------------------------------------------------------------------------------------------------------------------------------------------------------------------------------------------------------------------------------------------|
| ACEi                                                          | captopril, lisinopril, enalapril, benazepril, perindopril, quinapril, fosinopril, moexipril, ramipril, trandolapril                                                                                                                                                                                                                                                                                                                                                                                                                                     |
| ARB                                                           | losartan, valsartan, irbesartan, candesartan, eprosartan, telmisartan, azilsartan, Olmesartan                                                                                                                                                                                                                                                                                                                                                                                                                                                           |
| Other (excluding topical, ophthalmic, and drops preparations) | Bendroflumethiazide, chlorothiazide, indapamide, metolazone, bumetanide, furosemide, torsemide, ethacrynic, amiloride, triamterene, eplerenone, spironolactone, aliskiren, diltiazem, verapamil, amlodipine, nicardipine, felodipine, nifedipine, torsemide, ethacrynic, isradipine, nisoldipine, doxazosin, prazosin, terazosin, clonidine, guanfacine, methyl dopa, reserpine, hydralazine, minoxidil, acebutolol, atenolol, betaxolol, bisoprolol, carvedilol, labetalol, metoprolol, nadolol, nebivolol, penbutolol, pindolol, propranolol, timolol |
